# Supplementary material for: Analyzing the effects of thermal stress on insulator papers by solid-state 13C NMR spectroscopy
Source: Springer Nature journal article supplement (doi:10.1007/s10570-021-04338-z), 2021-11-29
Supplement: MOESM1 [file 19912200]

# Analyzing the effects of thermal stress on insulator papers by solid-state $^{13}\text{C}$ NMR spectroscopy

Paul Jusner<sup>1</sup>, Markus Bacher<sup>1</sup>, Jonas Simon<sup>1</sup>, Florian Bausch<sup>1</sup>, Hajar Khaliliyan<sup>1</sup>, Sonja Schiehser<sup>1</sup>, Ivan Sumerskii<sup>2</sup>, Elisabeth Schwaiger<sup>3</sup>, Antje Potthast<sup>1</sup>, Thomas Rosenau<sup>1,4</sup>

<sup>1</sup> Department of Chemistry, Institute of Chemistry of Renewable Resources, University of Natural Resources and Life Sciences Vienna (BOKU), Konrad-Lorenz-Straße 24, A-3430 Tulln, Austria

<sup>2</sup> Core Facility Analysis of Lignocellulosics, University of Natural Resources and Life Sciences Vienna (BOKU), Konrad-Lorenz-Straße 24, A-3430 Tulln, Austria

<sup>3</sup> Mondi Frantschach GmbH, Frantschach 5, A-9413 St. Gertraud, Austria

<sup>4</sup> Johan Gadolin Process Chemistry Centre, Åbo Akademi University, Porthansgatan 3, FI-20500 Åbo/Turku, Finland

## Supplementary information

### Table of content

|                                                                                    |       |
|------------------------------------------------------------------------------------|-------|
| 1. "Peak Analyzer" settings in OriginPro 2020                                      | p. 3  |
| 2. $^{13}\text{C}$ CP/MAS NMR results of Whatman paper No. 1 (WP) ageing series    | p. 4  |
| 3. $^{13}\text{C}$ CP/MAS NMR results of softwood Kraft paper (SWKP) ageing series | p. 11 |
| 4. Calculation of lateral crystallite dimension                                    | p. 19 |
| 5. References                                                                      | p. 20 |

### List of figures

|           |       |
|-----------|-------|
| Figure S1 | p. 4  |
| Figure S2 | p. 5  |
| Figure S3 | p. 6  |
| Figure S4 | p. 7  |
| Figure S4 | p. 8  |
| Figure S6 | p. 9  |
| Figure S7 | p. 10 |
| Figure S8 | p. 11 |
| Figure S9 | p. 12 |

|            |       |
|------------|-------|
| Figure S10 | p. 13 |
| Figure S11 | p. 14 |
| Figure S12 | p. 15 |
| Figure S13 | p. 16 |
| Figure S14 | p. 17 |
| Figure S15 | p. 18 |
| Figure S16 | p. 19 |
| Figure S17 | p. 20 |

### **List of tables**

|           |       |
|-----------|-------|
| Table S1  | p. 4  |
| Table S2  | p. 5  |
| Table S3  | p. 6  |
| Table S4  | p. 7  |
| Table S5  | p. 8  |
| Table S6  | p. 9  |
| Table S7  | p. 10 |
| Table S8  | p. 11 |
| Table S9  | p. 12 |
| Table S10 | p. 13 |
| Table S11 | p. 14 |
| Table S12 | p. 15 |
| Table S13 | p. 16 |
| Table S14 | p. 17 |
| Table S15 | p. 18 |
| Table S16 | p. 19 |
| Table S17 | p. 20 |

### **List of formulas**

|             |       |
|-------------|-------|
| Formula (1) | p. 19 |
|-------------|-------|

## 1. “Peak Analyzer” settings in OriginPro 2020

For deconvolution of the C4 resonance (79 to 91 ppm) of  $^{13}\text{C}$  CP/MAS NMR spectra, two distinct setups were implemented in the “Peak Analyzer” tool of OriginPro 2020 (OriginLab Corporation, USA). The softwood Kraft paper sample setup featured 8 peaks, whereas the setup for Whatman paper samples featured 7 peaks (no hemicelluloses signal). A constant baseline was set for each sample using the “minimum” mode. The maximum number of iterations was set to 500 at a tolerance value of  $1 * 10^{-4}$ . Negative ordinate peak values were excluded.

Peak positions (ppm) and shapes (Wickholm *et al.*, 1998, Zuckerstätter *et al.*, 2013):

P1 = 89.4, Lorentz ( $l\alpha$ )

P2 = 88.8, Lorentz ( $l\alpha\beta$ )

P3 = 88.5, Gaussian (PC)

P4 = 88.0, Lorentz ( $l\beta$ )

P5 = 84.2, Gaussian (AS I)

P6 = 83.9, Gaussian (IAS)

P7 = 83.2, Gaussian (AS II)

P8 = 81.7, Gaussian (HC)

Fit control peak constraints:

$w = \text{FWHH (ppm)} \pm 3 * \text{SD from Wickholm } et al. (1998)$

A = peak area

$A_{2} = A_{1} + A_{4}$ ;

$A_{1} < A_{4}$ ;

$A_{8} < A_{6}$ ;

$0.11 < w_{1} < 0.76$ ;

$0.34 < w_{2} < 0.58$ ;

$1.40 < w_{3} < 1.94$ ;

$0.30 < w_{4} < 1.31$ ;

$0.22 < w_{5} < 1.17$ ;

$2.54 < w_{6} < 5.17$ ;

$0.29 < w_{7} < 0.76$ ;

$0.55 < w_{8} < 1.86$ ;

## 2. $^{13}\text{C}$ CP/MAS NMR results of Whatman paper No. 1 (WP) ageing series

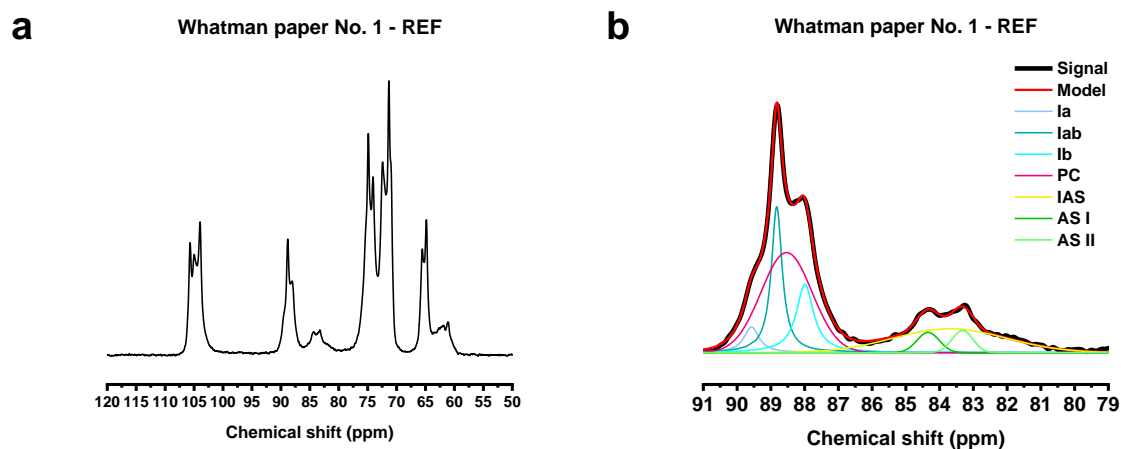

**Figure S1:**  $^{13}\text{C}$  CP/MAS NMR spectrum of  $\text{WP}_{\text{REF}}$  (a) and deconvoluted C4 resonance (b).

**Table S1:** Peak properties of C4 deconvolution ( $\text{WP}_{\text{REF}}$ ).

| WP REF         | Shape    | Relative intensity (%) | Position (ppm) | FWHH (ppm) |
|----------------|----------|------------------------|----------------|------------|
| $l\alpha$      | Lorentz  | 4.09                   | 89.57          | 0.54       |
| $l\alpha\beta$ | Lorentz  | 17.99                  | 88.82          | 0.39       |
| PC             | Gaussian | 36.64                  | 88.53          | 1.79       |
| $l\beta$       | Lorentz  | 13.61                  | 87.99          | 0.64       |
| AS I           | Gaussian | 3.90                   | 84.34          | 0.85       |
| IAS            | Gaussian | 20.37                  | 83.70          | 4.06       |
| AS II          | Gaussian | 3.39                   | 83.32          | 0.70       |

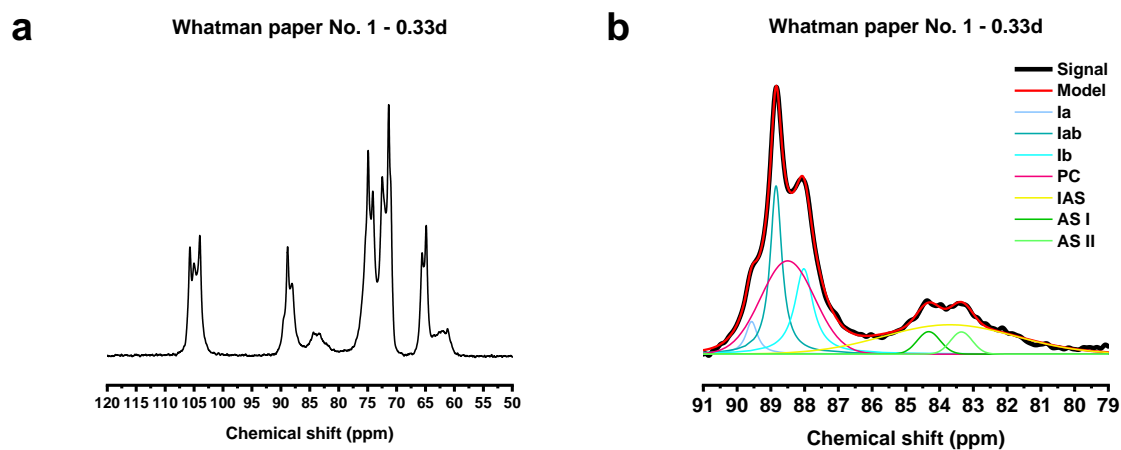

**Figure S2:** <sup>13</sup>C CP/MAS NMR spectrum of WP<sub>0.33d</sub> (a) and deconvoluted C4 resonance (b).

**Table S2:** Peak properties of C4 deconvolution (WP<sub>0.33d</sub>).

| WP 0.33d | Shape    | Relative intensity (%) | Position (ppm) | FWHH (ppm) |
|----------|----------|------------------------|----------------|------------|
| Iα       | Lorentz  | 3.56                   | 89.57          | 0.42       |
| Iαβ      | Lorentz  | 18.28                  | 88.85          | 0.41       |
| PC       | Gaussian | 32.38                  | 88.50          | 1.88       |
| Iβ       | Lorentz  | 14.52                  | 88.02          | 0.65       |
| AS I     | Gaussian | 3.31                   | 84.32          | 0.80       |
| IAS      | Gaussian | 24.83                  | 83.70          | 4.61       |
| AS II    | Gaussian | 3.11                   | 83.35          | 0.76       |

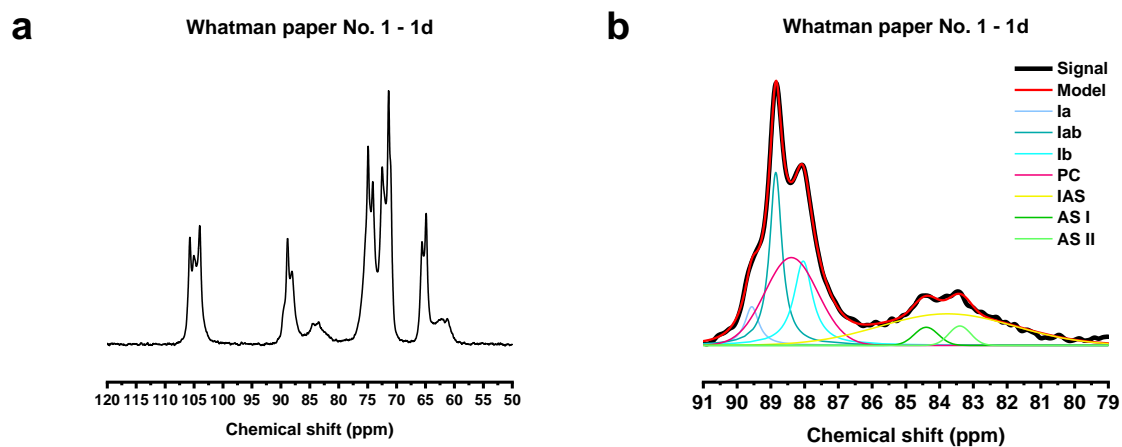

**Figure S3:** <sup>13</sup>C CP/MAS NMR spectrum of WP<sub>1d</sub> (a) and deconvoluted C4 resonance (b).

**Table S3:** Peak properties of C4 deconvolution (WP<sub>1d</sub>).

| WP 1d           | Shape    | Relative intensity (%) | Position (ppm) | FWHH (ppm) |
|-----------------|----------|------------------------|----------------|------------|
| I <sub>β</sub>  | Lorentz  | 4.88                   | 89.56          | 0.50       |
| I <sub>αβ</sub> | Lorentz  | 19.40                  | 88.85          | 0.44       |
| PC              | Gaussian | 29.30                  | 88.39          | 1.84       |
| I <sub>β</sub>  | Lorentz  | 14.27                  | 88.04          | 0.66       |
| AS I            | Gaussian | 2.75                   | 84.39          | 0.84       |
| IAS             | Gaussian | 26.73                  | 83.77          | 4.72       |
| AS II           | Gaussian | 2.67                   | 83.40          | 0.76       |

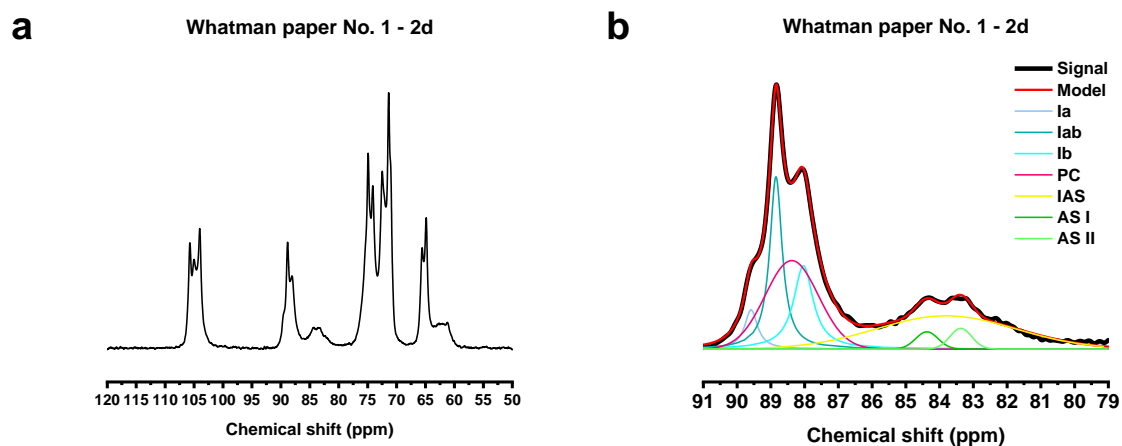

**Figure S4:** <sup>13</sup>C CP/MAS NMR spectrum of WP<sub>2d</sub> (a) and deconvoluted C4 resonance (b).

**Table S4:** Peak properties of C4 deconvolution (WP<sub>2d</sub>).

| WP 2d | Shape    | Relative intensity (%) | Position (ppm) | FWHH (ppm) |
|-------|----------|------------------------|----------------|------------|
| Iα    | Lorentz  | 4.43                   | 89.59          | 0.46       |
| Iαβ   | Lorentz  | 19.01                  | 88.85          | 0.44       |
| PC    | Gaussian | 28.90                  | 88.38          | 1.86       |
| Iβ    | Lorentz  | 14.34                  | 88.03          | 0.70       |
| AS I  | Gaussian | 2.36                   | 84.38          | 0.78       |
| IAS   | Gaussian | 28.20                  | 83.81          | 4.87       |
| AS II | Gaussian | 2.76                   | 83.37          | 0.76       |

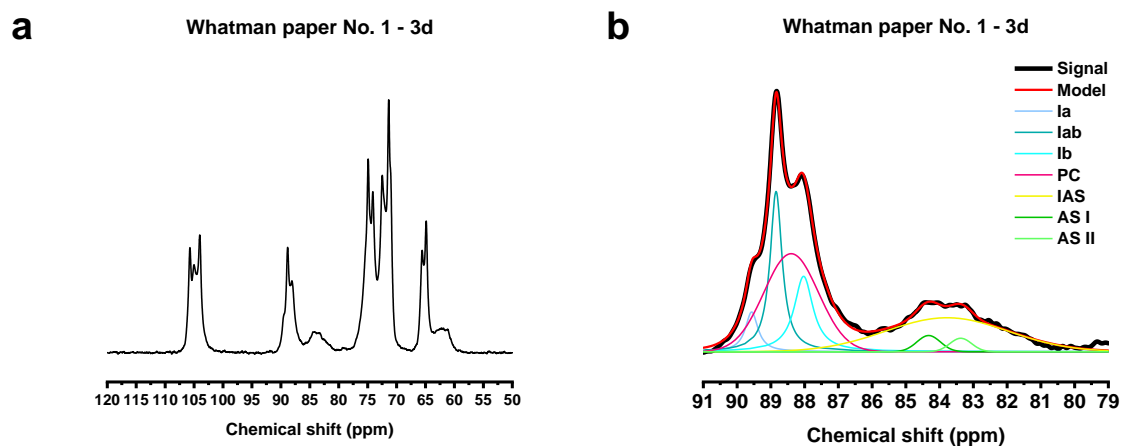

**Figure S5:** <sup>13</sup>C CP/MAS NMR spectrum of WP<sub>3d</sub> (a) and deconvoluted C4 resonance (b).

**Table S5:** Peak properties of C4 deconvolution (WP<sub>3d</sub>).

| WP 3d | Shape    | Relative intensity (%) | Position (ppm) | FWHH (ppm) |
|-------|----------|------------------------|----------------|------------|
| Iα    | Lorentz  | 4.55                   | 89.57          | 0.45       |
| Iαβ   | Lorentz  | 17.75                  | 88.84          | 0.43       |
| PC    | Gaussian | 34.02                  | 88.40          | 1.90       |
| Iβ    | Lorentz  | 12.98                  | 88.03          | 0.67       |
| AS I  | Gaussian | 2.43                   | 84.32          | 0.82       |
| IAS   | Gaussian | 26.40                  | 83.79          | 4.27       |
| AS II | Gaussian | 1.87                   | 83.37          | 0.76       |



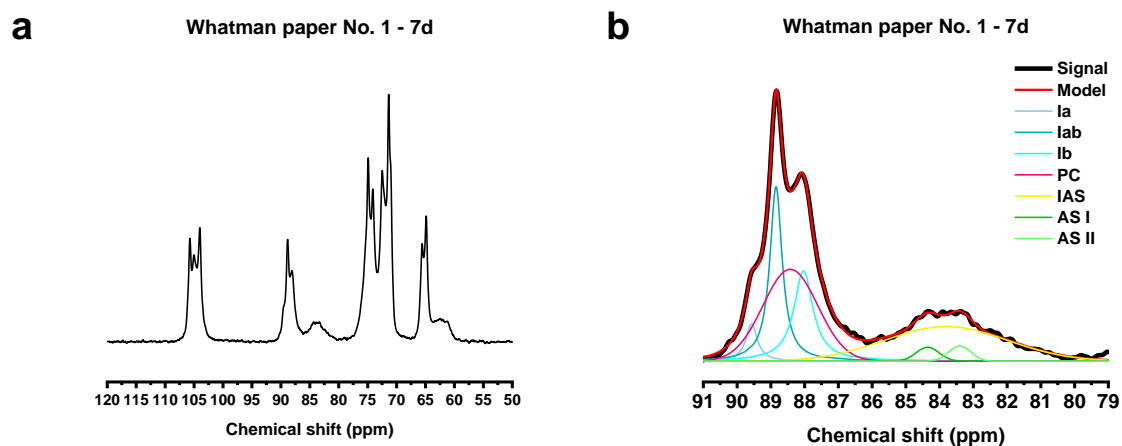

**Figure S6:** <sup>13</sup>C CP/MAS NMR spectrum of WP<sub>7d</sub> (a) and deconvoluted C4 resonance (b).

**Table S6:** Peak properties of C4 deconvolution (WP<sub>7d</sub>).

| WP 7d                  | Shape    | Relative intensity (%) | Position (ppm) | FWHH (ppm) |
|------------------------|----------|------------------------|----------------|------------|
| <i>l</i> <sub>α</sub>  | Lorentz  | 3.77                   | 89.57          | 0.41       |
| <i>l</i> <sub>αβ</sub> | Lorentz  | 19.33                  | 88.85          | 0.44       |
| PC                     | Gaussian | 31.23                  | 88.42          | 1.91       |
| <i>l</i> <sub>β</sub>  | Lorentz  | 15.36                  | 88.03          | 0.68       |
| AS I                   | Gaussian | 1.99                   | 84.35          | 0.80       |
| IAS                    | Gaussian | 26.24                  | 83.81          | 4.27       |
| AS II                  | Gaussian | 2.07                   | 83.40          | 0.76       |

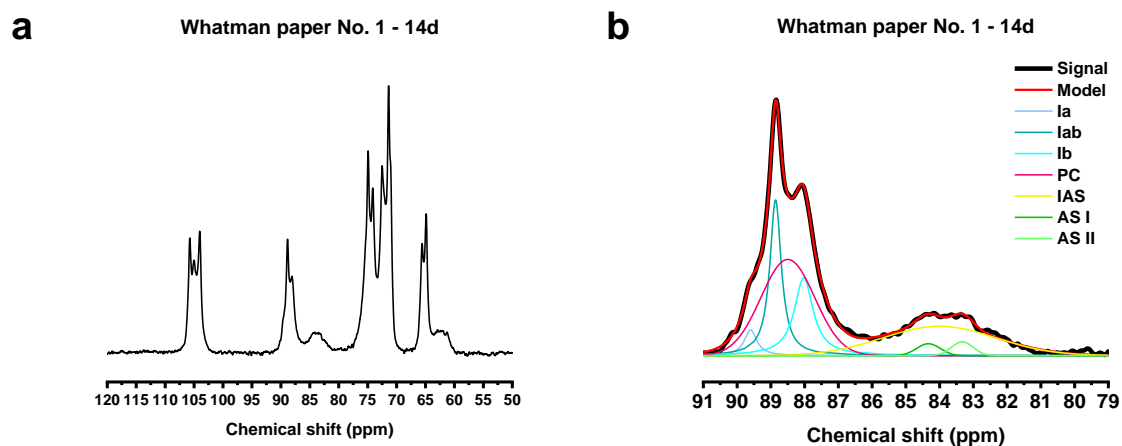

**Figure S7:** <sup>13</sup>C CP/MAS NMR spectrum of WP<sub>14d</sub> (a) and deconvoluted C4 resonance (b).

**Table S7:** Peak properties of C4 deconvolution (WP<sub>14d</sub>).

| WP 14d | Shape    | Relative intensity (%) | Position (ppm) | FWHH (ppm) |
|--------|----------|------------------------|----------------|------------|
| Iα     | Lorentz  | 3.23                   | 89.60          | 0.45       |
| Iαβ    | Lorentz  | 18.20                  | 88.86          | 0.41       |
| PC     | Gaussian | 36.29                  | 88.50          | 1.87       |
| Iβ     | Lorentz  | 14.73                  | 88.03          | 0.67       |
| AS I   | Gaussian | 2.00                   | 84.33          | 0.83       |
| IAS    | Gaussian | 23.43                  | 84.01          | 3.96       |
| AS II  | Gaussian | 2.12                   | 83.33          | 0.76       |

### 3. $^{13}\text{C}$ CP/MAS NMR results of softwood Kraft paper (SWKP) ageing series

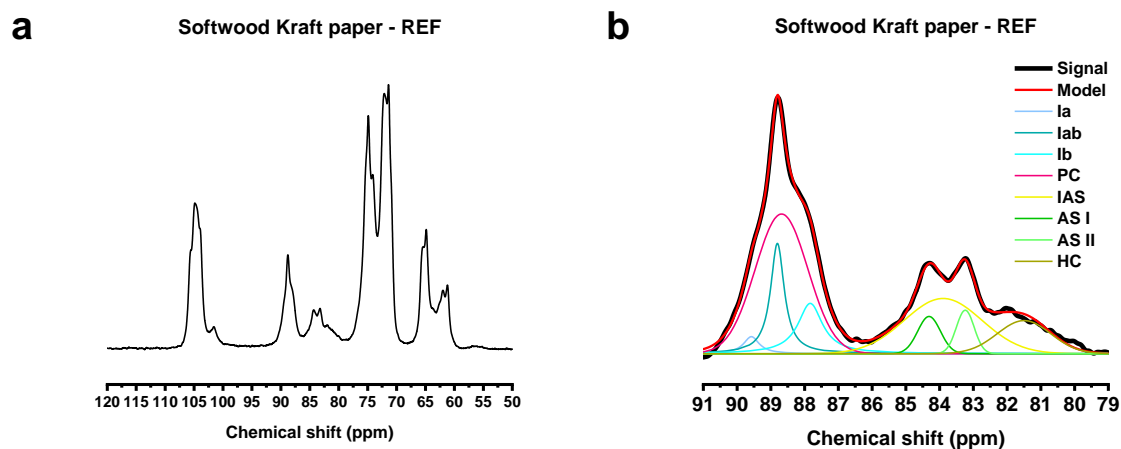

**Figure S8:**  $^{13}\text{C}$  CP/MAS NMR spectrum of SWKP<sub>REF</sub> (a) and deconvoluted C4 resonance (b).

**Table S8:** Peak properties of C4 deconvolution (SWKP<sub>REF</sub>).

| SWKP REF       | Shape    | Relative intensity (%) | Position (ppm) | FWHH (ppm) |
|----------------|----------|------------------------|----------------|------------|
| $l\alpha$      | Lorentz  | 1.94                   | 89.58          | 0.56       |
| $l\alpha\beta$ | Lorentz  | 11.26                  | 88.81          | 0.49       |
| PC             | Gaussian | 38.00                  | 88.68          | 1.84       |
| $l\beta$       | Lorentz  | 9.10                   | 87.83          | 0.88       |
| AS I           | Gaussian | 4.38                   | 84.31          | 0.79       |
| IAS            | Gaussian | 22.17                  | 83.90          | 2.71       |
| AS II          | Gaussian | 4.02                   | 83.24          | 0.62       |
| HC             | Gaussian | 9.13                   | 81.50          | 1.86       |

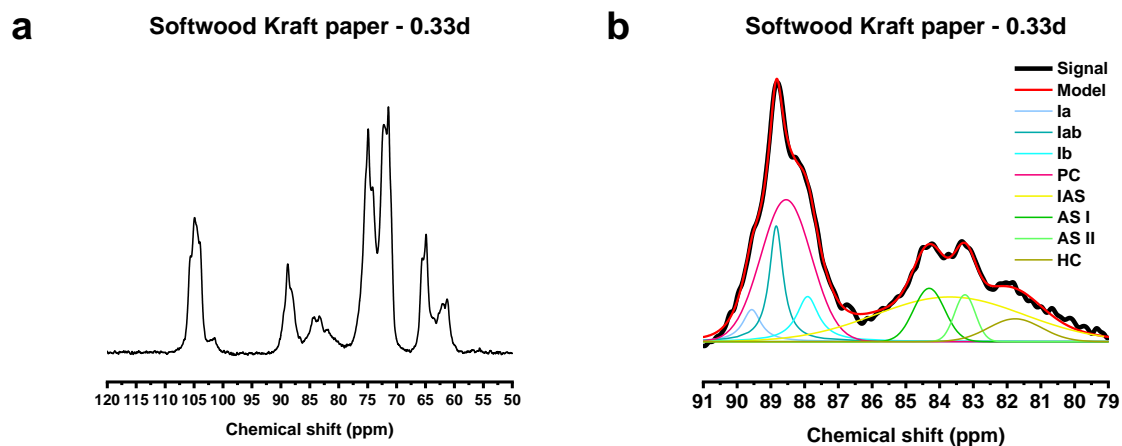

**Figure S9:**  $^{13}\text{C}$  CP/MAS NMR spectrum of SWKP<sub>0.33d</sub> (a) and deconvoluted C4 resonance (b).

**Table S9:** Peak properties of C4 deconvolution (SWKP<sub>0.33d</sub>).

| SWKP 0.33d     | Shape    | Relative intensity (%) | Position (ppm) | FWHH (ppm) |
|----------------|----------|------------------------|----------------|------------|
| $l\alpha$      | Lorentz  | 3.69                   | 89.56          | 0.65       |
| $l\alpha\beta$ | Lorentz  | 10.37                  | 88.84          | 0.49       |
| PC             | Gaussian | 32.52                  | 88.55          | 1.76       |
| $l\beta$       | Lorentz  | 6.45                   | 87.91          | 0.79       |
| AS I           | Gaussian | 7.47                   | 84.31          | 1.08       |
| IAS            | Gaussian | 29.56                  | 83.70          | 5.17       |
| AS II          | Gaussian | 4.42                   | 83.25          | 0.73       |
| HC             | Gaussian | 5.52                   | 81.76          | 1.86       |

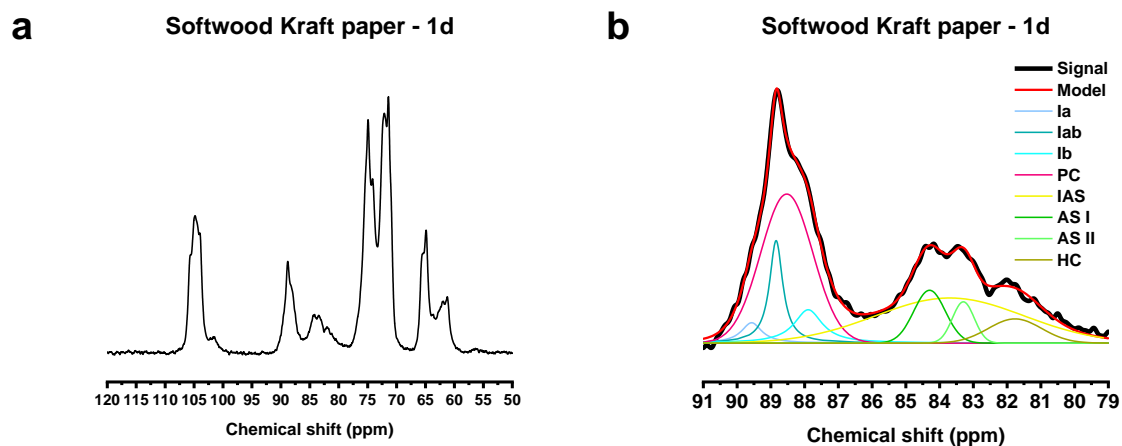

**Figure S10:** <sup>13</sup>C CP/MAS NMR spectrum of SWKP<sub>1d</sub> (a) and deconvoluted C4 resonance (b).

**Table S10:** Peak properties of C4 deconvolution (SWKP<sub>1d</sub>).

| SWKP 1d                | Shape    | Relative intensity (%) | Position (ppm) | FWHH (ppm) |
|------------------------|----------|------------------------|----------------|------------|
| <i>l</i> <sub>α</sub>  | Lorentz  | 2.60                   | 89.57          | 0.73       |
| <i>l</i> <sub>αβ</sub> | Lorentz  | 8.90                   | 88.84          | 0.47       |
| PC                     | Gaussian | 35.19                  | 88.53          | 1.82       |
| <i>l</i> <sub>β</sub>  | Lorentz  | 5.98                   | 87.89          | 1.00       |
| AS I                   | Gaussian | 7.56                   | 84.30          | 1.10       |
| IAS                    | Gaussian | 29.83                  | 83.70          | 5.17       |
| AS II                  | Gaussian | 4.08                   | 83.30          | 0.76       |
| HC                     | Gaussian | 5.86                   | 81.77          | 1.86       |

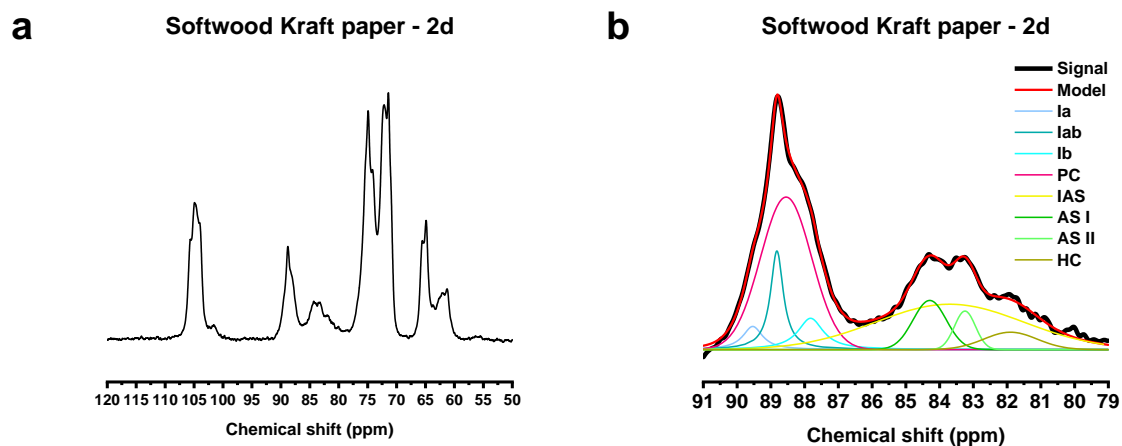

**Figure S11:** <sup>13</sup>C CP/MAS NMR spectrum of SWKP<sub>2d</sub> (a) and deconvoluted C4 resonance (b).

**Table S11:** Peak properties of C4 deconvolution (SWKP<sub>2d</sub>).

| SWKP 2d | Shape    | Relative intensity (%) | Position (ppm) | FWHH (ppm) |
|---------|----------|------------------------|----------------|------------|
| Iα      | Lorentz  | 2.97                   | 89.54          | 0.71       |
| Iαβ     | Lorentz  | 8.52                   | 88.82          | 0.45       |
| PC      | Gaussian | 36.44                  | 88.55          | 1.78       |
| Iβ      | Lorentz  | 5.28                   | 87.82          | 0.91       |
| AS I    | Gaussian | 7.66                   | 84.29          | 1.16       |
| IAS     | Gaussian | 30.99                  | 83.70          | 5.17       |
| AS II   | Gaussian | 3.79                   | 83.25          | 0.73       |
| HC      | Gaussian | 4.35                   | 81.90          | 1.86       |

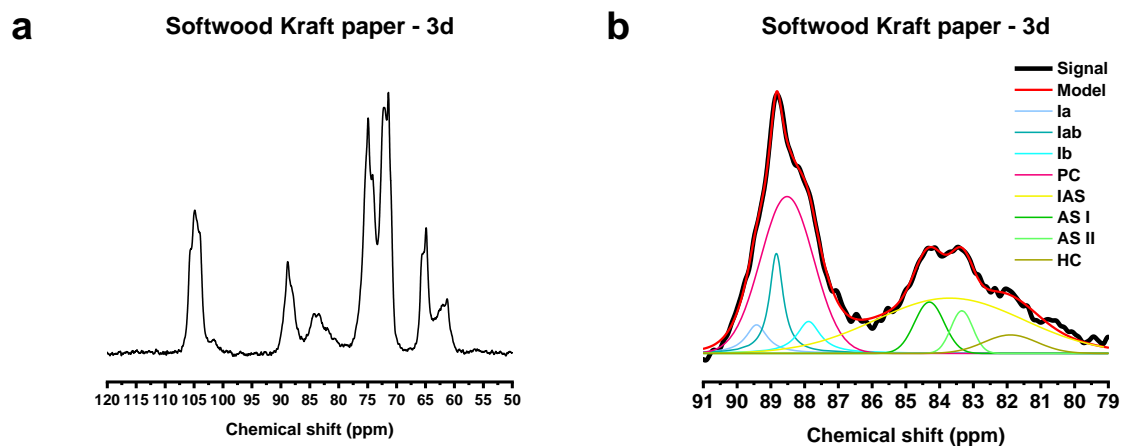

**Figure S12:**  $^{13}\text{C}$  CP/MAS NMR spectrum of SWKP<sub>3d</sub> (a) and deconvoluted C4 resonance (b).

**Table S12:** Peak properties of C4 deconvolution (SWKP<sub>3d</sub>).

| SWKP 3d        | Shape    | Relative intensity (%) | Position (ppm) | FWHH (ppm) |
|----------------|----------|------------------------|----------------|------------|
| $l\alpha$      | Lorentz  | 3.55                   | 89.42          | 0.76       |
| $l\alpha\beta$ | Lorentz  | 8.30                   | 88.84          | 0.49       |
| PC             | Gaussian | 35.09                  | 88.52          | 1.85       |
| $l\beta$       | Lorentz  | 4.51                   | 87.88          | 0.84       |
| AS I           | Gaussian | 6.40                   | 84.30          | 1.03       |
| IAS            | Gaussian | 34.07                  | 83.70          | 5.17       |
| AS II          | Gaussian | 3.92                   | 83.34          | 0.76       |
| HC             | Gaussian | 4.16                   | 81.90          | 1.86       |

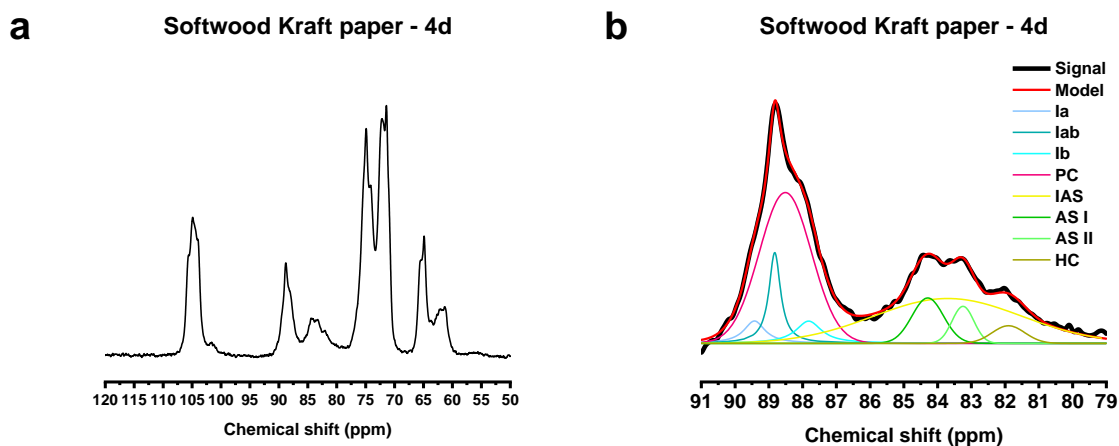

**Figure S13:**  $^{13}\text{C}$  CP/MAS NMR spectrum of SWKP<sub>4d</sub> (a) and deconvoluted C4 resonance (b).

**Table S13:** Peak properties of C4 deconvolution (SWKP<sub>4d</sub>).

| SWKP 4d        | Shape    | Relative intensity (%) | Position (ppm) | FWHH (ppm) |
|----------------|----------|------------------------|----------------|------------|
| $l\alpha$      | Lorentz  | 3.23                   | 89.43          | 0.75       |
| $l\alpha\beta$ | Lorentz  | 7.56                   | 88.83          | 0.41       |
| PC             | Gaussian | 38.84                  | 88.51          | 1.81       |
| $l\beta$       | Lorentz  | 4.04                   | 87.82          | 0.92       |
| AS I           | Gaussian | 7.08                   | 84.29          | 1.10       |
| IAS            | Gaussian | 32.41                  | 83.70          | 5.17       |
| AS II          | Gaussian | 4.00                   | 83.25          | 0.76       |
| HC             | Gaussian | 2.85                   | 81.90          | 1.14       |



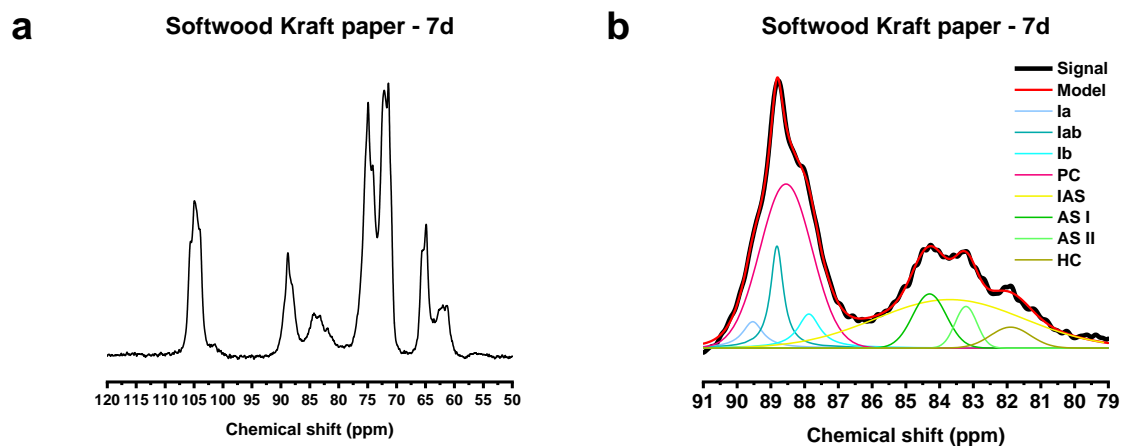

**Figure S14:**  $^{13}\text{C}$  CP/MAS NMR spectrum of SWKP<sub>7d</sub> (a) and deconvoluted C4 resonance (b).

**Table S14:** Peak properties of C4 deconvolution (SWKP<sub>7d</sub>).

| SWKP 7d        | Shape    | Relative intensity (%) | Position (ppm) | FWHH (ppm) |
|----------------|----------|------------------------|----------------|------------|
| $l\alpha$      | Lorentz  | 3.27                   | 89.54          | 0.74       |
| $l\alpha\beta$ | Lorentz  | 8.24                   | 88.82          | 0.46       |
| PC             | Gaussian | 37.26                  | 88.55          | 1.81       |
| $l\beta$       | Lorentz  | 4.73                   | 87.87          | 0.79       |
| AS I           | Gaussian | 7.95                   | 84.30          | 1.17       |
| IAS            | Gaussian | 30.93                  | 83.70          | 5.17       |
| AS II          | Gaussian | 3.97                   | 83.22          | 0.76       |
| HC             | Gaussian | 3.65                   | 81.90          | 1.39       |

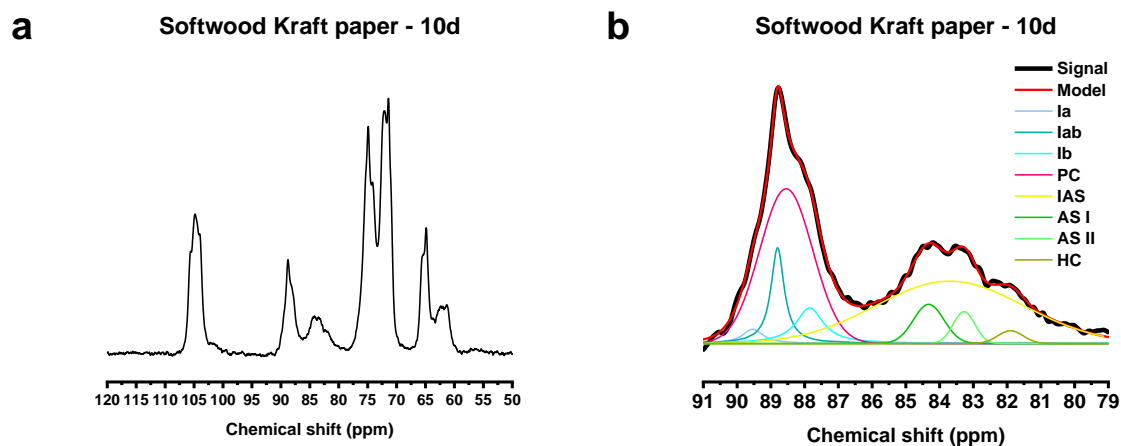

**Figure S15:** <sup>13</sup>C CP/MAS NMR spectrum of SWKP<sub>10d</sub> (a) and deconvoluted C4 resonance (b).

**Table S15:** Peak properties of C4 deconvolution (SWKP<sub>10d</sub>).

| SWKP 10d       | Shape    | Relative intensity (%) | Position (ppm) | FWHH (ppm) |
|----------------|----------|------------------------|----------------|------------|
| $l\alpha$      | Lorentz  | 1.76                   | 89.54          | 0.74       |
| $l\alpha\beta$ | Lorentz  | 7.93                   | 88.80          | 0.47       |
| PC             | Gaussian | 35.44                  | 88.55          | 1.85       |
| $l\beta$       | Lorentz  | 5.92                   | 87.85          | 0.97       |
| AS I           | Gaussian | 5.17                   | 84.32          | 1.06       |
| IAS            | Gaussian | 39.37                  | 83.70          | 5.17       |
| AS II          | Gaussian | 3.01                   | 83.28          | 0.76       |
| HC             | Gaussian | 1.40                   | 81.90          | 0.88       |

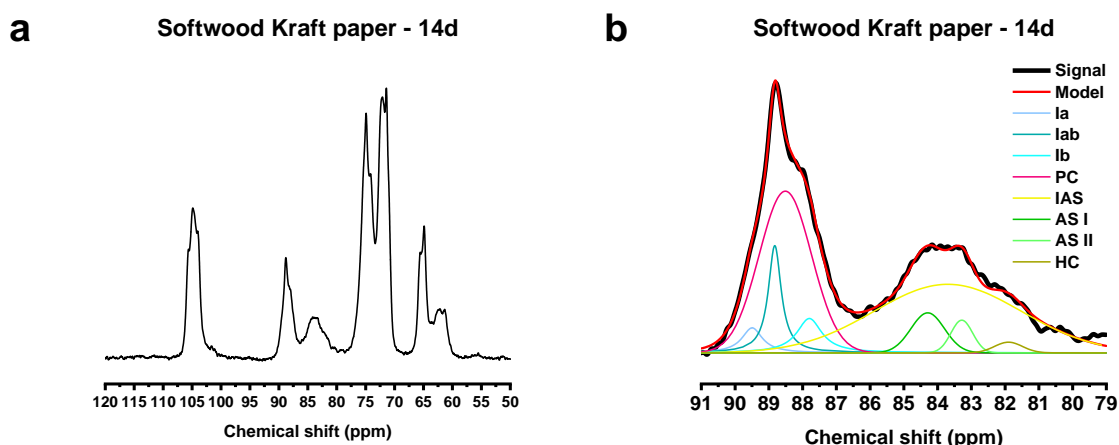

**Figure S16:** <sup>13</sup>C CP/MAS NMR spectrum of SWKP<sub>14d</sub> (a) and deconvoluted C4 resonance (b).

**Table S16:** Peak properties of C4 deconvolution (SWKP<sub>14d</sub>).

| SWKP 14d | Shape    | Relative intensity (%) | Position (ppm) | FWHH (ppm) |
|----------|----------|------------------------|----------------|------------|
| Iα       | Lorentz  | 2.87                   | 89.49          | 0.73       |
| Iαβ      | Lorentz  | 8.09                   | 88.82          | 0.46       |
| PC       | Gaussian | 34.30                  | 88.51          | 1.83       |
| Iβ       | Lorentz  | 4.97                   | 87.80          | 0.90       |
| AS I     | Gaussian | 5.44                   | 84.29          | 1.17       |
| IAS      | Gaussian | 40.25                  | 83.70          | 5.14       |
| AS II    | Gaussian | 2.88                   | 83.28          | 0.76       |
| HC       | Gaussian | 1.20                   | 81.90          | 0.97       |

#### 4. Calculation of lateral crystallite dimension

The lateral crystallite dimensions ( $LD$ ) of the samples were calculated with formula (1) published by Newman (1999) by inserting crystallinity indices ( $CI$ ) obtained from C4 deconvolution of <sup>13</sup>C CP/MAS NMR spectra and the average surface layer distance ( $d$ ) of cellulose chains in a single crystallite.

$$(1) \quad LD = (2 * d) / (1 - CI^{0.5})$$

$LD$  = lateral crystallite dimension

$d$  = average surface layer distance

$CI$  = crystallinity index

Newman compared wide angle x-ray scattering (WAXS) results for the  $LD$  of several samples with results calculated via formula (1) by inserting the  $CI$  from <sup>13</sup>C NMR spectra of the same samples and  $d$  derived from the 6 \* 6 cellulose chain model (0.57 nm).

We calculated the  $LD$  of our samples based on  $d$  derived from the 24 cellulose chain crystallite model proposed by Oehme *et al.* (2015) (100 layer: 0.40 nm, 110 layer: 0.54 nm, 1-10 layer: 0.62,  $d$ : 0.52 nm). This is only an approximation, but when using the  $CI$ s determined by Newman via <sup>13</sup>C NMR and inserting  $d$  of the 24 chains model instead of  $d$  based on the 6 \* 6 chain model, a better correlation of the original Newman-data with the WAXS results for  $LD$

was found (cf. **Table S17** and **Figure S17**). Hence, we conclude that this is a valid approach for evaluating  $^{13}\text{C}$  NMR data.

**Table S17:** *LD* and *CI* data published by Newman (1999) plus *LD* calculated based on the 24 chains model proposed by Oehme *et al.* (2015).

| Sample                | <i>CI</i> NMR | <i>LD</i> 6*6 chains | <i>LD</i> 24 chains | <i>LD</i> WAXS |
|-----------------------|---------------|----------------------|---------------------|----------------|
| Asplenium frond fibre | 0.324         | 2.646                | 2.413               | 2.600          |
| Sisal twine           | 0.435         | 3.348                | 3.053               | 3.000          |
| Phormium leaf fibre   | 0.448         | 3.448                | 3.143               | 3.300          |
| Cyathea frond fibre   | 0.450         | 3.463                | 3.158               | 3.100          |
| Eucalyptus wood       | 0.488         | 3.782                | 3.448               | 3.500          |
| Jute twine            | 0.489         | 3.791                | 3.456               | 3.400          |
| Avicel powder         | 0.653         | 5.940                | 5.416               | 5.400          |
| Linen sewing thread   | 0.661         | 6.097                | 5.559               | 5.600          |
| Sigma C-6663 powder   | 0.771         | 9.349                | 8.524               | 7.900          |
| Cotton fabric         | 0.777         | 9.618                | 8.770               | 7.800          |

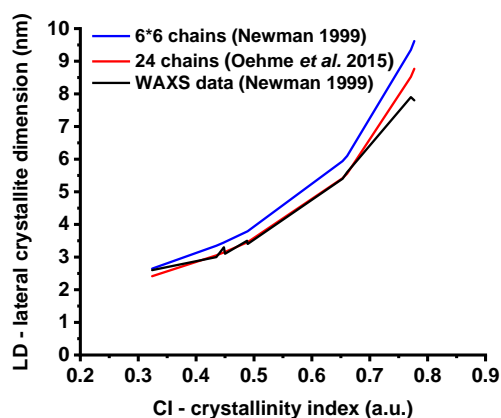

**Figure S17:** *LD* calculated with *d* based on the 6 \* 6 model, *LD* calculated with *d* based on the 24 cellulose chains model, and *LD* obtained from WAXS measurements plotted against *CI*.

## 5. References

- Newman, R. H. 1999. Estimation of the lateral dimensions of cellulose crystallites using  $^{13}\text{C}$  NMR signal strengths. *Solid State Nuclear Magnetic Resonance*, 15, 21-29.
- Oehme, D. P., Downton, M. T., Doblin, M. S., Wagner, J., Gidley, M. J. & Bacic, A. 2015. Unique aspects of the structure and dynamics of elementary I $\beta$  cellulose microfibrils revealed by computational simulations. *Plant Physiology*, 168, 3-17.
- Wickholm, K., Larsson, P. T. & Iversen, T. 1998. Assignment of non-crystalline forms in cellulose I by CP/MAS  $^{13}\text{C}$  NMR spectroscopy. *Carbohydrate Research*, 312, 123-129.
- Zuckerstätter, G., Terinte, N., Sixta, H. & Schuster, K. C. 2013. Novel insight into cellulose supramolecular structure through  $^{13}\text{C}$  CP-MAS NMR spectroscopy and paramagnetic relaxation enhancement. *Carbohydrate Polymers*, 93, 122-8.
